# Supplementary material for: Being treated in higher volume hospitals leads to longer progression-free survival for epithelial ovarian carcinoma patients in the Rhone-Alpes region of France
Source: Springer Nature journal article supplement (doi:10.1186/s12913-017-2802-2), 2018-01-04
Supplement: MOESM1 [file 15344862]

**Additional file 1** displays the log-log survival curves (threshold of 12 cases), which are a transformation of the standard Kaplan Meier estimator. These curves can be used to test the proportional hazard assumption. Indeed, the hazard is proportional if the two curves look parallel, meaning that the hazard ratio is constant over time. In our case, the two curves doesn't look parallel and even cross each other at the bottom right of the plot, meaning that the hazard is not proportional.

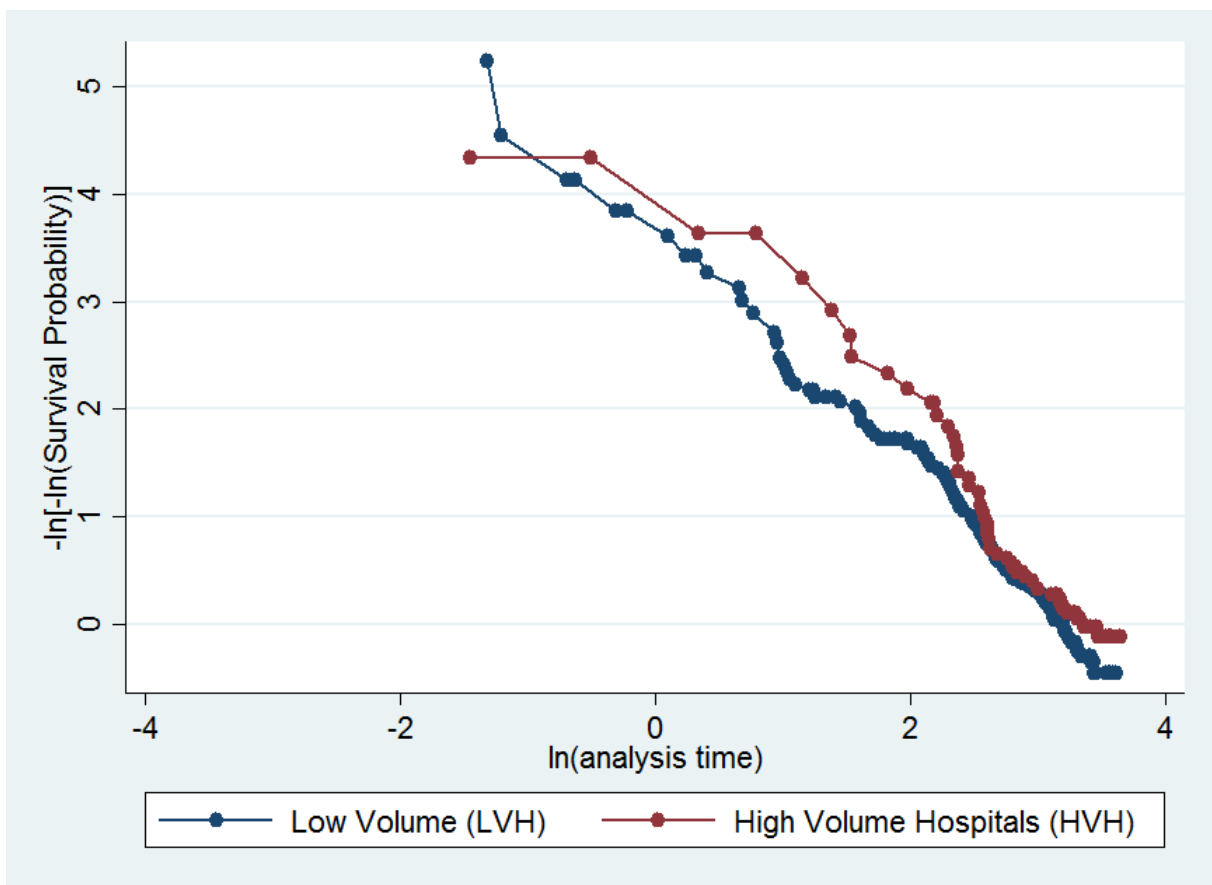

Additional file 1: Log-Log progression free survival curves comparing LVH and HVH
